# Supplementary material
Source: MDPI journal article supplement (https://www.mdpi.com/2071-1050/7/12/15793)
Supplement: s1 [file s1]

# Supplementary Materials: Quantitative Assessment of the Human Appropriation of Net Primary Production (HANPP) in the Coastal Areas of Jiangsu, China

Fangyi Zhang, Lijie Pu and Qing Huang

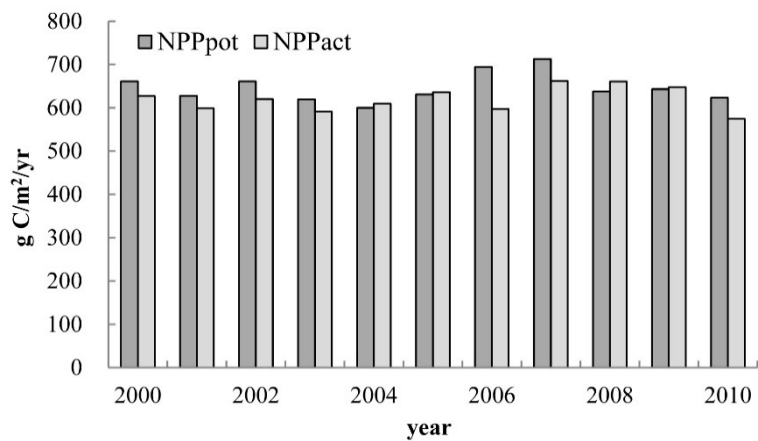

Figure S1. NPP<sub>pot</sub> and NPP<sub>act</sub> of the coastal areas of Jiangsu over the period 2000–2010.

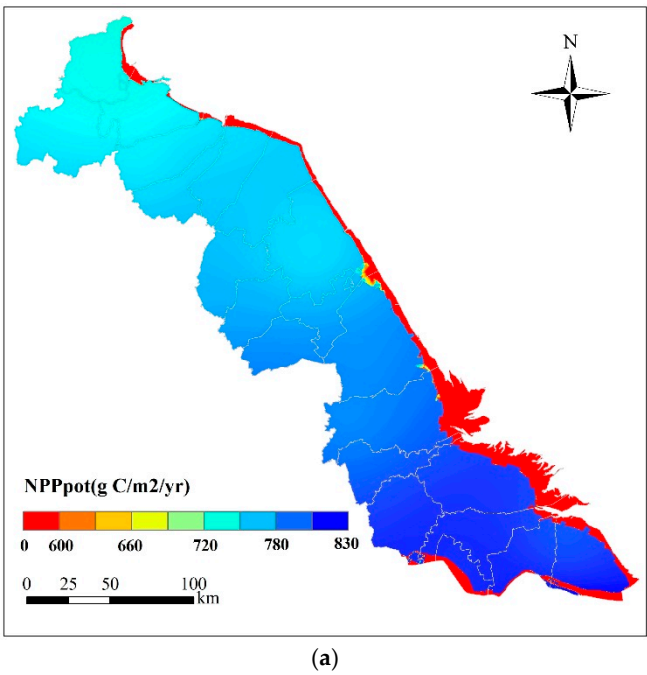

Figure S2. Cont.

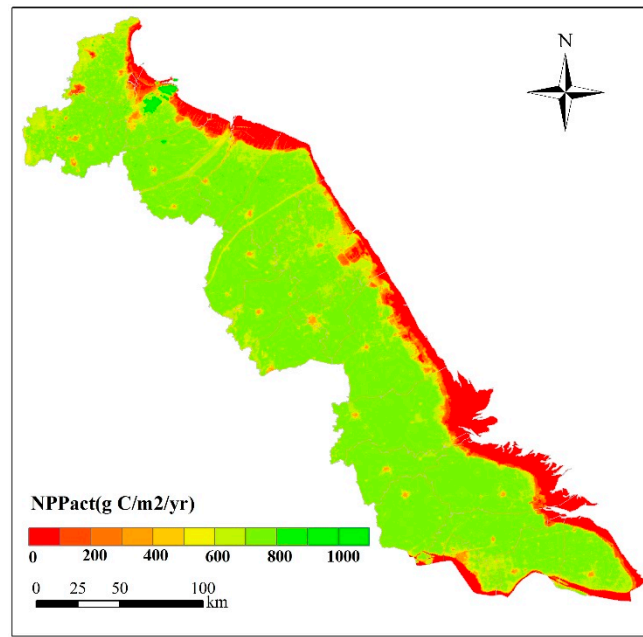

(b)

**Figure S2.** The distribution of average NPP<sub>act</sub> over the period 2000–2010.

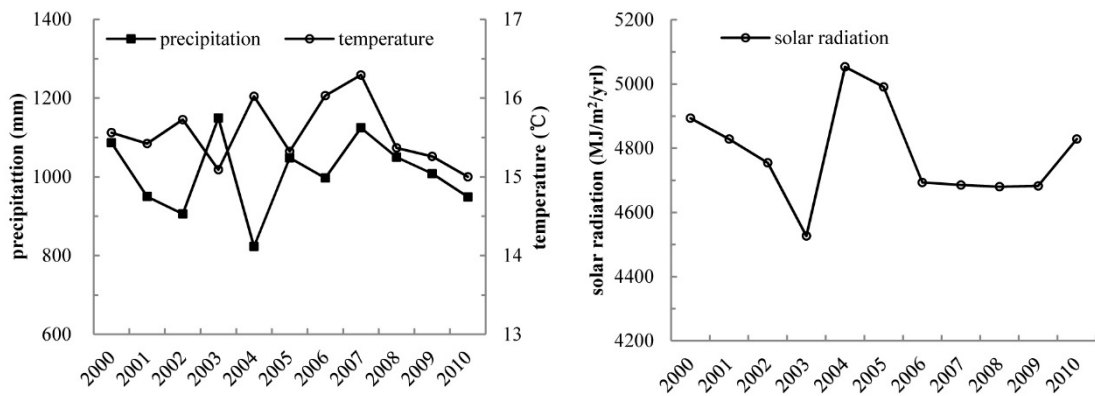

**Figure S3.** The average precipitation, temperature and solar radiation of the coastal areas of Jiangsu over the period 2000–2010.

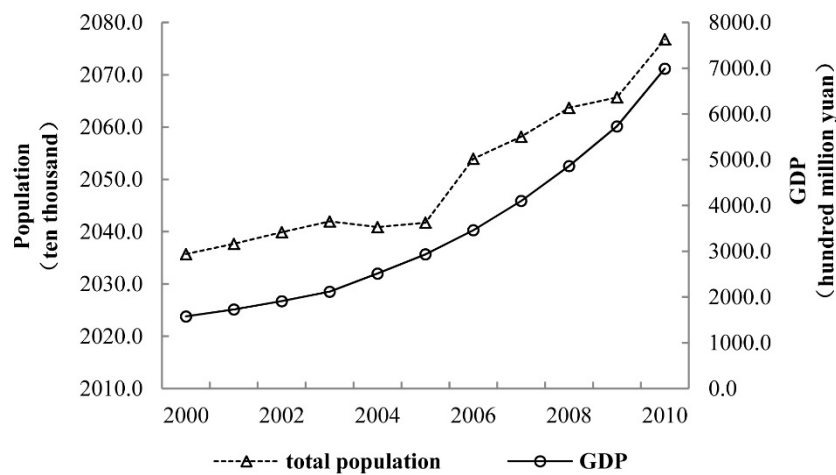

**Figure S4.** The total population and GDP of the coastal areas of Jiangsu from 2000 to 2010.

**Table S1.** The average proportions of all studied crops in the counties of the coastal areas of Jiangsu from 2000 to 2010.

| Counties             | Wheat  | Barley | Pea    | Rice   | Maize  | Soybea | Potatoes | Peanut | Rapeseed | Sesame | Cotton |
|----------------------|--------|--------|--------|--------|--------|--------|----------|--------|----------|--------|--------|
| Lianyungang district | 41.50% | 0.04%  | 0.00%  | 42.39% | 4.54%  | 3.87%  | 0.24%    | 0.13%  | 0.23%    | 0.00%  | 7.06%  |
| Ganyu                | 37.48% | 2.12%  | 0.06%  | 26.42% | 8.34%  | 1.83%  | 5.42%    | 17.28% | 0.00%    | 0.00%  | 1.04%  |
| Donghai              | 41.88% | 0.11%  | 0.02%  | 36.01% | 6.78%  | 2.99%  | 3.63%    | 8.41%  | 0.01%    | 0.00%  | 0.15%  |
| Guanyun              | 38.76% | 1.01%  | 0.00%  | 31.87% | 8.91%  | 4.89%  | 1.27%    | 0.15%  | 0.60%    | 0.01%  | 12.52% |
| Guannan              | 45.40% | 0.90%  | 0.03%  | 37.46% | 6.11%  | 2.97%  | 1.52%    | 0.12%  | 1.44%    | 0.01%  | 4.05%  |
| Yancheng district    | 15.22% | 18.94% | 2.14%  | 23.42% | 3.61%  | 3.24%  | 0.82%    | 0.34%  | 6.69%    | 0.15%  | 25.42% |
| Xiangshui            | 20.93% | 9.69%  | 0.79%  | 27.99% | 10.11% | 3.66%  | 1.68%    | 2.67%  | 8.43%    | 0.01%  | 14.05% |
| Binhai               | 21.22% | 6.57%  | 1.22%  | 29.51% | 10.81% | 3.16%  | 1.88%    | 1.64%  | 16.80%   | 0.02%  | 7.15%  |
| Funing               | 30.92% | 7.05%  | 1.53%  | 41.15% | 4.54%  | 3.22%  | 1.19%    | 1.08%  | 6.68%    | 0.03%  | 2.61%  |
| Sheyang              | 18.92% | 15.27% | 3.03%  | 22.35% | 4.45%  | 2.70%  | 0.81%    | 0.78%  | 6.15%    | 0.25%  | 25.28% |
| Jianhu               | 35.85% | 2.55%  | 0.91%  | 45.39% | 0.66%  | 3.01%  | 0.56%    | 0.22%  | 5.72%    | 0.15%  | 4.98%  |
| Yandu                | 30.91% | 8.51%  | 0.61%  | 43.33% | 0.76%  | 2.42%  | 0.12%    | 0.07%  | 6.75%    | 0.05%  | 6.48%  |
| Dongtai              | 18.89% | 8.81%  | 2.07%  | 15.66% | 15.08% | 7.88%  | 1.21%    | 2.30%  | 16.25%   | 0.16%  | 11.68% |
| Dafeng               | 18.94% | 11.95% | 2.17%  | 14.28% | 8.86%  | 5.10%  | 0.00%    | 1.80%  | 10.85%   | 0.36%  | 25.69% |
| Nantong district     | 24.29% | 0.15%  | 4.17%  | 31.07% | 5.69%  | 10.18% | 0.50%    | 1.93%  | 21.13%   | 0.59%  | 0.29%  |
| Hai'an               | 40.41% | 1.13%  | 0.67%  | 43.51% | 3.01%  | 2.56%  | 0.33%    | 0.40%  | 6.91%    | 0.00%  | 1.06%  |
| Rudong               | 25.18% | 10.75% | 4.63%  | 32.55% | 4.15%  | 4.20%  | 0.37%    | 1.37%  | 9.34%    | 0.04%  | 7.43%  |
| Qidong               | 2.35%  | 0.15%  | 24.43% | 0.08%  | 18.23% | 17.93% | 1.43%    | 7.84%  | 17.03%   | 0.35%  | 10.17% |
| Rugao                | 32.25% | 3.92%  | 1.63%  | 35.99% | 5.93%  | 5.12%  | 2.09%    | 3.17%  | 9.20%    | 0.02%  | 0.69%  |
| Tongzhou             | 20.53% | 0.90%  | 7.65%  | 27.25% | 5.38%  | 6.74%  | 0.75%    | 3.62%  | 20.44%   | 0.31%  | 6.44%  |
| Haimen               | 5.02%  | 0.53%  | 19.22% | 2.34%  | 16.05% | 9.53%  | 1.97%    | 11.29% | 24.05%   | 0.71%  | 9.31%  |

**Table S2.** The HANPP value in 2000 and the HANPP change from 2000 to 2010 in the counties of the coastal areas of Jiangsu.

| Counties             | HANPP% of NPP <sub>pot</sub> |                          | HANPP <sub>pluc</sub> of NPP <sub>pot</sub> |                          |
|----------------------|------------------------------|--------------------------|---------------------------------------------|--------------------------|
|                      | Value in 2000                | Change from 2000 to 2010 | Value in 2000                               | Change from 2000 to 2010 |
| Lianyungang district | 16.7%                        | 29.9%                    | 9.0%                                        | 3.8%                     |
| Ganyu                | 31.9%                        | 25.1%                    | -2.3%                                       | -0.1%                    |
| Donghai              | 41.2%                        | 25.6%                    | -7.3%                                       | 7.0%                     |
| Guanyun              | 40.1%                        | 37.1%                    | 2.5%                                        | 4.6%                     |
| Guannan              | 37.2%                        | 41.6%                    | -5.5%                                       | 9.9%                     |
| Yancheng district    | 16.5%                        | 31.5%                    | -1.1%                                       | 0.7%                     |
| Xiangshui            | 40.2%                        | 24.4%                    | 13.6%                                       | 1.1%                     |
| Binhai               | 40.7%                        | 23.2%                    | 3.9%                                        | -2.8%                    |
| Funing               | 47.7%                        | 30.6%                    | -1.7%                                       | 2.4%                     |
| Sheyang              | 54.0%                        | 6.3%                     | 11.3%                                       | -9.4%                    |
| Jianhu               | 58.0%                        | 23.4%                    | 17.4%                                       | 1.0%                     |
| Yandu                | 64.3%                        | 13.0%                    | -0.2%                                       | 3.3%                     |
| Dongtai              | 51.0%                        | 2.7%                     | 4.8%                                        | 0.3%                     |
| Dafeng               | 44.8%                        | 9.0%                     | 13.9%                                       | -4.2%                    |
| Nantong district     | 36.3%                        | 21.6%                    | 14.4%                                       | 14.0%                    |
| Hai'an               | 54.8%                        | 12.0%                    | 1.3%                                        | 3.0%                     |
| Rudong               | 57.4%                        | 10.3%                    | 11.1%                                       | 3.2%                     |
| Qidong               | 46.6%                        | 13.9%                    | 9.2%                                        | 17.3%                    |
| Rugao                | 50.4%                        | 7.4%                     | 3.2%                                        | 3.8%                     |
| Tongzhou             | 62.9%                        | 2.8%                     | 5.4%                                        | 8.3%                     |
| Haimen               | 43.3%                        | 9.8%                     | 5.2%                                        | 14.8%                    |
